# Supplementary material for: Tuning hydrogen bond network connectivity in the electric double layer with cations
Source: Royal Society of Chemistry journal article supplement (doi:10.1039/d3sc06904d), 2024-01-01
Supplement: d3sc06904d1.pdf [file d3sc06904d1.pdf]

## Supplementary Materials for

### **Tuning Hydrogen Bond Network Connectivity in the Electric Double Layer with Cations**

Bo Tang<sup>a</sup>, Yeguang Fang<sup>b</sup>, Shuang Zhu<sup>a</sup>, Qi Bai<sup>a</sup>, Xiaojiao Li<sup>a</sup>, Laiyang Wei<sup>a</sup>, Zhenyu Li<sup>c,\*</sup> and Chongqin Zhu<sup>a,\*</sup>

<sup>a</sup>Key Laboratory of Theoretical and Computational Photochemistry, Ministry of Education, College of Chemistry, Beijing Normal University, Beijing 100875, China. E-mail: cqzhu@bnu.edu.cn

<sup>b</sup>Laboratory of Theoretical and Computational Nanoscience, CAS Key Laboratory of Nanosystem and Hierarchical Fabrication, CAS Center for Excellence in Nanoscience, National Center for Nanoscience and Technology, Beijing 100190, China

<sup>c</sup>Hefei National Research Center for Physical Sciences at the Microscale, University of Science and Technology of China, Hefei, Anhui230026, P. R. China. E-mail: zyli@ustc.edu.cn

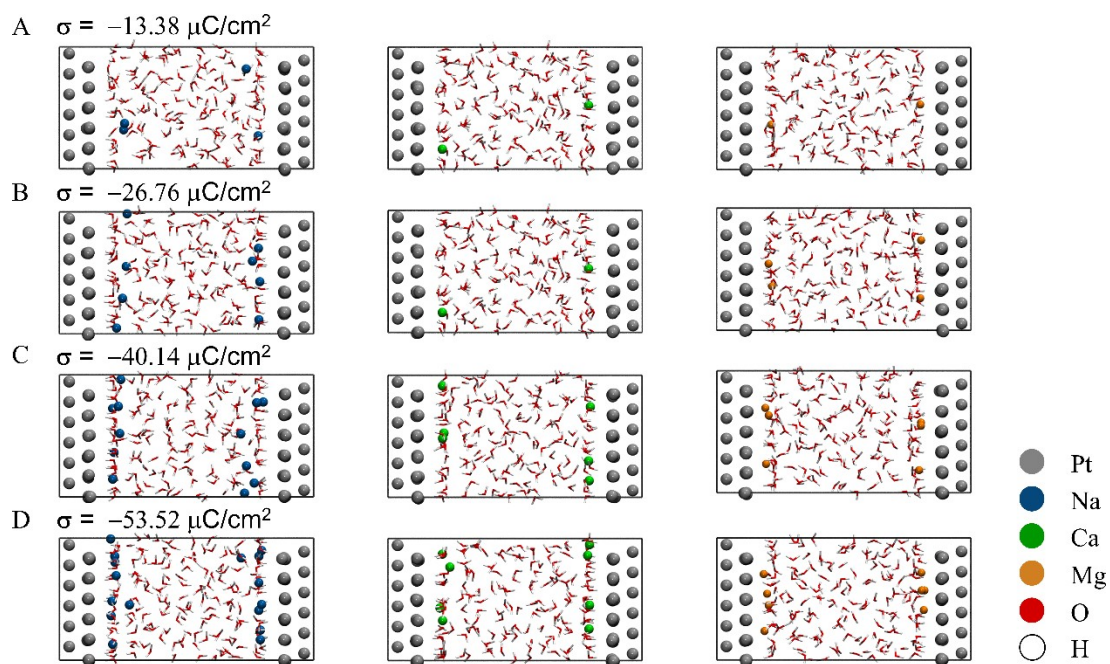

**Fig. S1.** AIMD models of Pt(111)/water interfaces in the presence of different counter cations. (A)  $\sigma = -13.38 \mu\text{C}/\text{cm}^2$ , (B)  $\sigma = -26.76 \mu\text{C}/\text{cm}^2$ , (C)  $\sigma = -40.14 \mu\text{C}/\text{cm}^2$ , (D)  $\sigma = -53.52 \mu\text{C}/\text{cm}^2$ . The Pt, Na, Ca, Mg, O and H atoms are colored by silver, blue, green, orange, red and white, respectively.

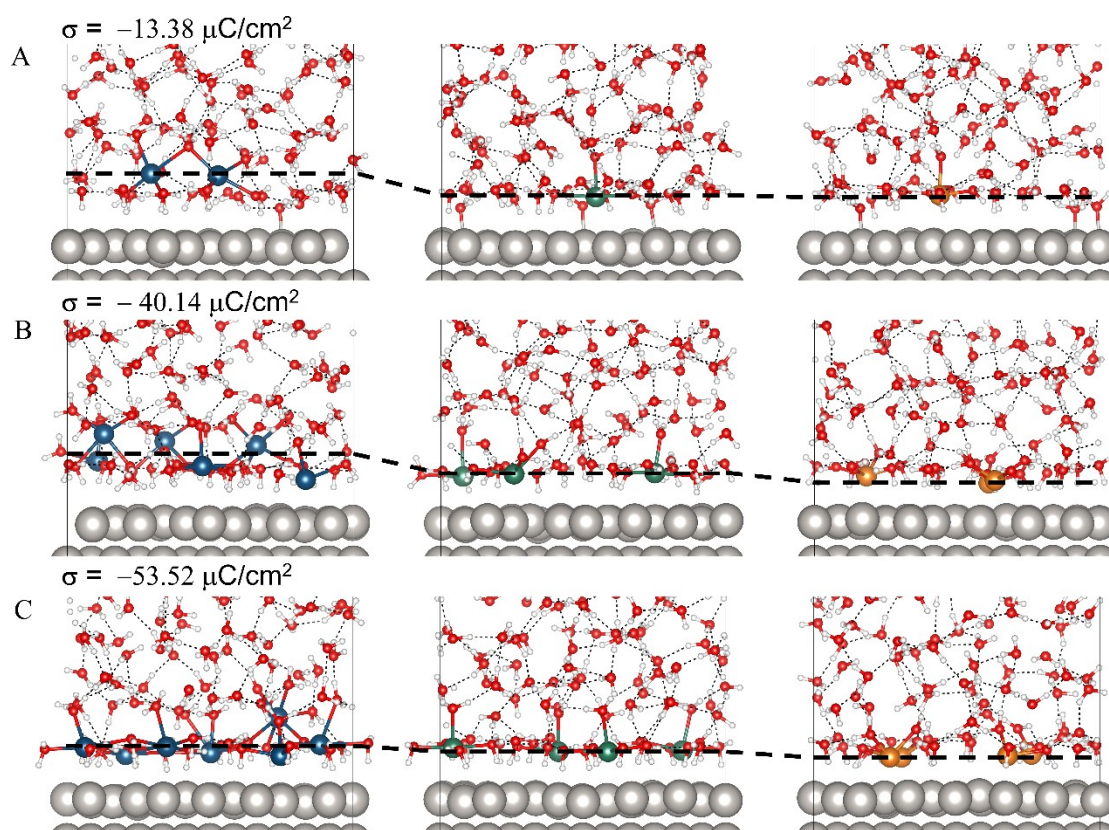

**Fig. S2.** Representative snapshots of the EDL structure at Pt(111)/water interfaces in the  $\text{Na}^+$ ,  $\text{Ca}^{2+}$  and  $\text{Mg}^{2+}$  systems. (A)  $\sigma = -13.38$ , (B)  $-40.14$  and (C)  $-53.52 \mu\text{C}/\text{cm}^2$ . The CIPs for all systems are presented by black dashed lines.

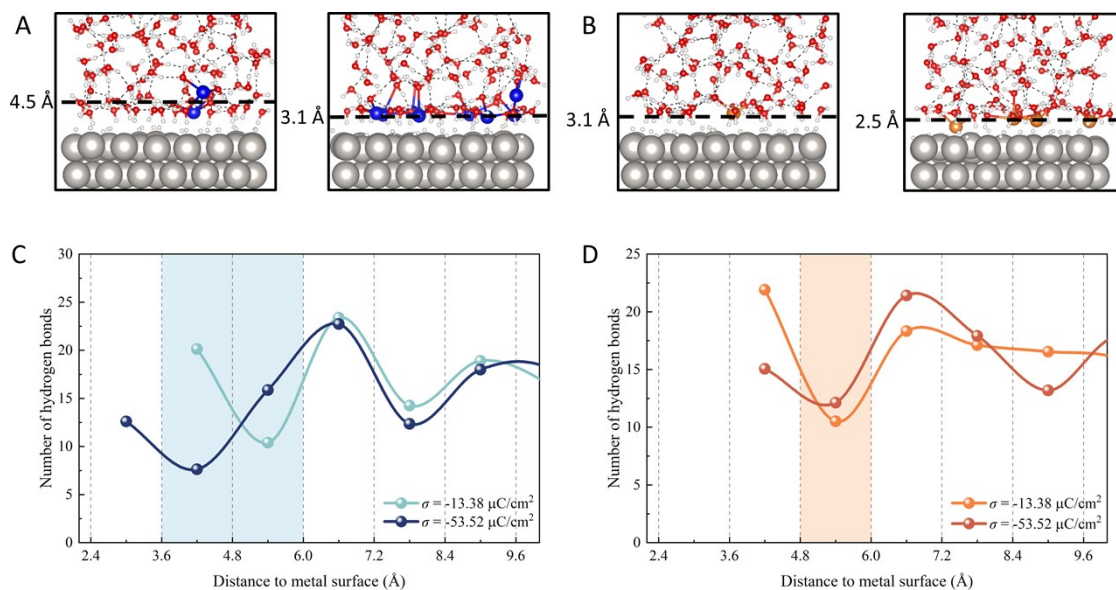

**Figure S3.** Representative snapshots of EDL structures at Pt(111)-H<sub>ad</sub>/water interfaces (covered with 2/3 monolayer H<sub>ad</sub>) for (A) Na<sup>+</sup> and (B) Mg<sup>2+</sup> systems at  $\sigma = -13.38 \mu\text{C}/\text{cm}^2$  and  $\sigma = -53.52 \mu\text{C}/\text{cm}^2$ . The red, white, silver, blue and orange spheres represent O, H, Pt, Na and Mg elements, respectively. Statistic distributions of the number of H-bonds along the surface normal direction in the (C) Na<sup>+</sup> and (D) Mg<sup>2+</sup> systems at  $\sigma = -13.38 \mu\text{C}/\text{cm}^2$  and  $\sigma = -53.52 \mu\text{C}/\text{cm}^2$ . The CIPs for all systems are presented by black dashed lines.

As shown in Figure S1, models for three systems ( $\text{Na}^+$ ,  $\text{Ca}^{2+}$ ,  $\text{Mg}^{2+}$ ) were constructed at different charge densities by varying the number of cations. Using the developed computational standard hydrogen electrode (cSHE),<sup>1</sup> the electrode potential  $U$  at Pt/water interfaces with respect to the SHE can be calculated with

$$e_0 U = -E_F^{(i)} - e_0 \phi_{\text{wat}}^{(i)} + \Delta_{dp} A_{\text{H}_3\text{O}^+}^{(w)} - \mu_{\text{H}^+}^{g,\circ} - \Delta E_{zp}$$

where  $e_0$  is the unit charge,  $E_F^{(i)}$  and  $\phi_{\text{wat}}^{(i)}$  are the Fermi energy and the electrostatic potential of the bulk water in the interface model, respectively.  $\Delta_{dp} A_{\text{H}_3\text{O}^+}^{(w)}$  is the deprotonation free energy of  $\text{H}_3\text{O}^+(aq)$  calculated in a pure water model with a recommended value of 15.35 eV.  $\mu_{\text{H}^+}^{g,\circ}$  and  $\Delta E_{zp}$  are the standard chemical potential of gas phase proton and a correction for the zero-point energy of O-H bond in  $\text{H}_3\text{O}^+(aq)$ , respectively. These two terms are known constants, 15.81 eV and 0.35 eV, respectively. By averaging over *ab initio* molecular dynamics (AIMD) trajectories of the interface models, one can easily obtain  $E_F^{(i)}$  and  $\phi_{\text{wat}}^{(i)}$ . Figure S2 shows the time accumulative averages of  $E_F^{(i)}$  and  $\phi_{\text{wat}}^{(i)}$  for the three systems, both of which are averaged over configurations taken every 20 MD steps along the AIMD trajectories to check their convergence. It can be seen that both  $E_F^{(i)}$  and  $\phi_{\text{wat}}^{(i)}$  converge well within an uncertainty of 0.1 eV after  $\sim 10$  ps AIMD runs.

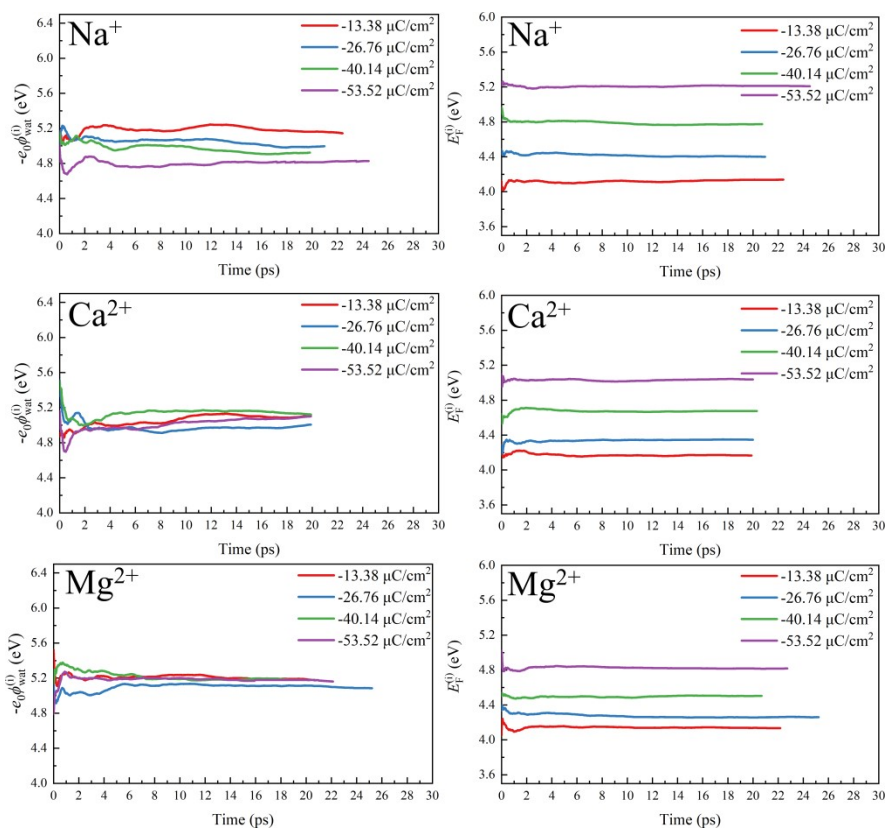

**Fig. S4.** Calculated  $E_F^{(i)}$  and  $-e_0 \phi_{\text{wat}}^{(i)}$  for the three systems. Time-accumulated averages of Fermi energies ( $E_F^{(i)}$ ) and electrostatic potential energies of bulk water ( $-e_0 \phi_{\text{wat}}^{(i)}$ ) in AIMD simulations of  $\text{Na}^+$ ,  $\text{Ca}^{2+}$ , and  $\text{Mg}^{2+}$  systems at various surface charge densities.

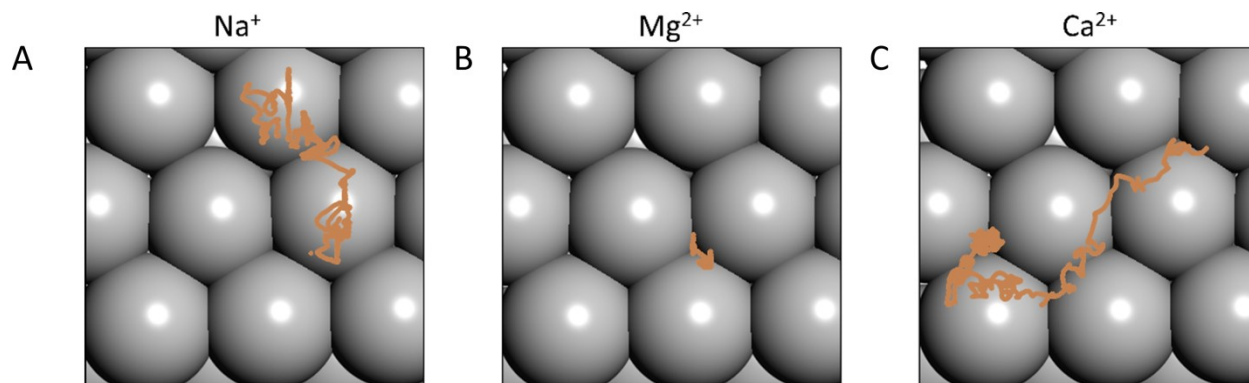

**Figure S5.** A ~10 ps trajectory of a (A)  $\text{Na}^+$ , (B)  $\text{Mg}^{2+}$  or (C)  $\text{Ca}^{2+}$  on the Pt(111) surface at  $\sigma = -53.52 \mu\text{C}/\text{cm}^2$ .

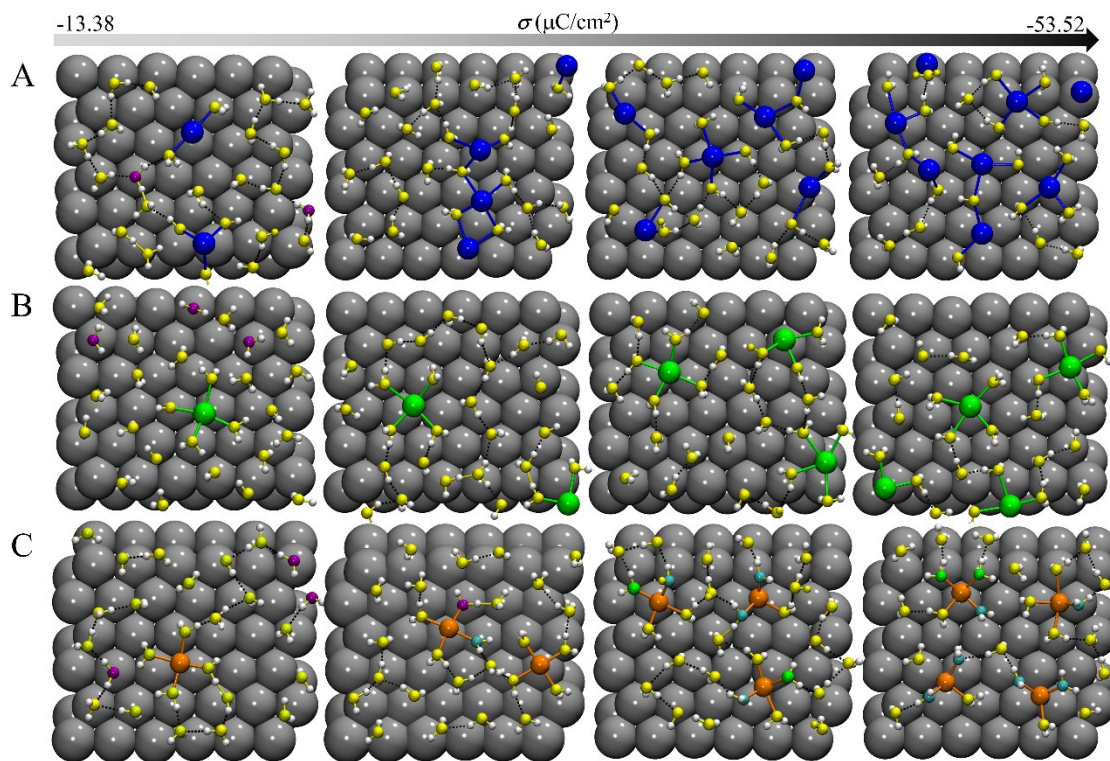

**Fig. S6.** Top view of representative AIMD snapshots of local structures of the (A)  $\text{Na}^+$ , (B)  $\text{Ca}^{2+}$ , and (C)  $\text{Mg}^{2+}$  systems.

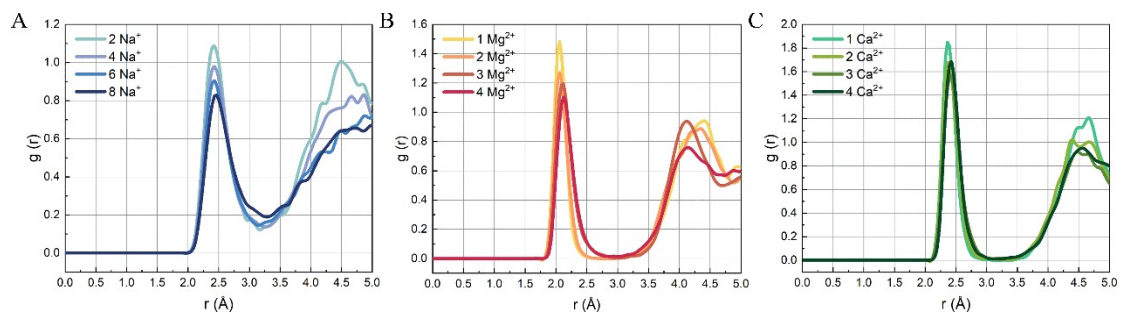

**Fig. S7.** Radial distribution functions for (A)  $\text{Na}^+$ - $\text{O}_w$ , (B)  $\text{Mg}^{2+}$ - $\text{O}_w$ , and (C)  $\text{Ca}^{2+}$ - $\text{O}_w$  at the Pt-water interface for different surface charge densities.



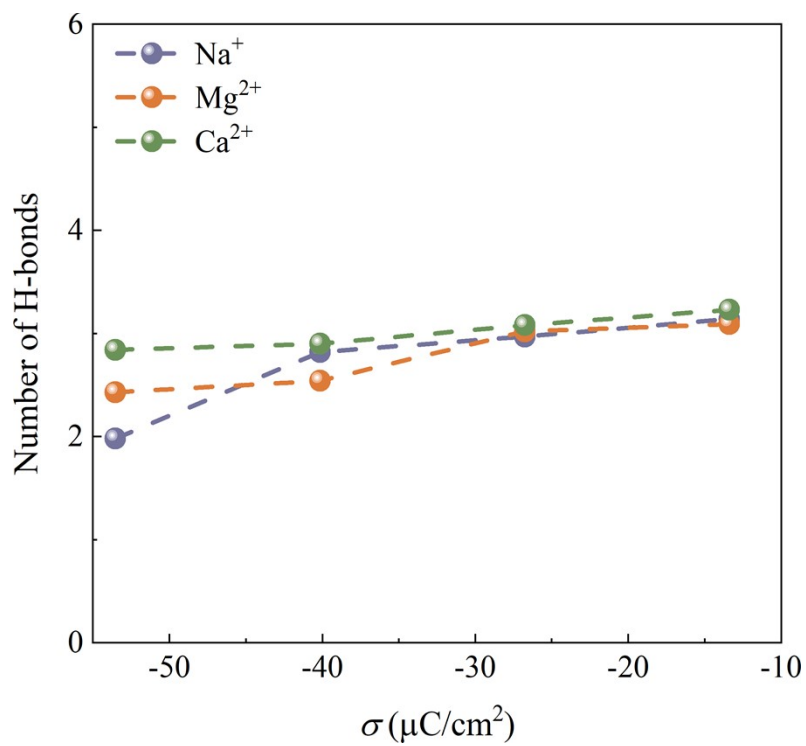

**Fig. S8.** The number of Hydrogen bonds per water molecule in the H-bond gap zone as a function of  $\sigma$  in the three systems.

## REFERENCE

1. J. Le, M. Iannuzzi, A. Cuesta, J. Cheng, Determining potentials of zero charge of metal electrodes versus the standard hydrogen electrode from density-functional-theory-based molecular dynamics. *Phys. Rev. Lett.* **119**, 016801 (2017).
